# Supplementary material for: Intermittent hypoxia inhibits mandibular cartilage growth with reduced TGF-β and SOX9 expressions in neonatal rats
Source: PubMed Central journal article supplement (PMC7806651; doi:10.1038/s41598-020-80303-3), 2021-01-13
Supplement: 41598_2020_80303_MOESM1_ESM.pdf [file 41598_2020_80303_MOESM1_ESM.pdf]

## **Supplementary information**

### **Intermittent Hypoxia Inhibits Mandibular Cartilage Growth with Reduced TGF- $\beta$ and SOX9 Expressions in Neonatal Rats**

**Kochakorn Lekvijittada<sup>1,2,3</sup>, Jun Hosomichi<sup>1,3</sup>, Hideyuki Maeda<sup>3</sup>, Haixin Hong<sup>1,3</sup>, Chidsanu Changsiripun<sup>2</sup>, Yo-ichiro Kuma<sup>1</sup>, Shuji Oishi<sup>1</sup>, Jun-ichi Suzuki<sup>4</sup>, Ken-ichi Yoshida<sup>3</sup>, Takashi Ono<sup>1</sup>**

<sup>1</sup>Department of Orthodontic Science, Graduate School of Medical and Dental Sciences, Tokyo Medical and Dental University (TMDU), Tokyo, Japan

<sup>2</sup>Department of Orthodontics, Faculty of Dentistry, Chulalongkorn University, Bangkok, Thailand

<sup>3</sup>Department of Forensic Medicine, Graduate School of Medicine, Tokyo Medical University, Tokyo, Japan

<sup>4</sup>Department of Advanced Clinical Science and Therapeutics, Graduate School of Medicine, The University of Tokyo, Tokyo, Japan

**Supplementary Table S1a. Definitions of landmarks in radiographic images**

|                             |                                                                                      |                                                                                                                                                                       |
|-----------------------------|--------------------------------------------------------------------------------------|-----------------------------------------------------------------------------------------------------------------------------------------------------------------------|
| Lateral view landmarks      | N                                                                                    | The most anterior point on the nasal bone                                                                                                                             |
|                             | E                                                                                    | The intersection of the frontal bone and floor of anterior cranial fossa                                                                                              |
|                             | Po                                                                                   | The most posterior and superior points on the skull                                                                                                                   |
|                             | Co                                                                                   | The most posterior and superior points on the mandibular condyle                                                                                                      |
|                             | So                                                                                   | The intersection of the most anterior tympanic bulla and the superior border of the sphenoid corpus                                                                   |
|                             | Ba                                                                                   | The most posterior and inferior points on the occipital condyle                                                                                                       |
|                             | Go                                                                                   | The most posterior point on the mandibular ramus                                                                                                                      |
|                             | Gn                                                                                   | The most inferior point on the ramus that lies on a perpendicular bisector of the line Go-Mn                                                                          |
|                             | Mn                                                                                   | The most concave portion of the concavity on the inferior border of the mandibular corpus                                                                             |
|                             | Me                                                                                   | The most inferior and anterior points of the lower border of the mandible                                                                                             |
|                             | Mu                                                                                   | The junction of the alveolar bone and the mesial surface of the first maxillary molar                                                                                 |
|                             | Mi                                                                                   | The junction of the alveolar bone and the mesial surface of the first mandibular molar                                                                                |
| LI                          | The most anterior and superior points on the alveolar bone of the mandibular incisor |                                                                                                                                                                       |
| Dorsoventral view landmarks | Go1, Go2                                                                             | The points on the angle of the mandible that produce the widest width; Go1 is the point on the left and Go2 is the point on the right                                 |
|                             | C1, C2                                                                               | The points on the cranium that produce the widest cranial width; C1 is the point on the left and C2 is the point on the right                                         |
|                             | P1, P2                                                                               | The most anterior and medial points within the temporal fossae that produce the narrowest palatal width; P1 is the point on the left and P2 is the point on the right |

**Supplementary Table S1b. Cephalometric measurements**

|                         |         |                                 |
|-------------------------|---------|---------------------------------|
| Neurocranium            | Po-N    | Total skull length              |
|                         | Po-E    | Cranial vault length            |
|                         | Ba-E    | Total cranial base length       |
|                         | So-E    | Anterior cranial base length    |
|                         | Ba-So   | Posterior cranial base length   |
|                         | Po-Ba   | Posterior neurocranium height   |
| Viscerocranium          | E-N     | Nasal length                    |
|                         | E-Mu    | Viscerocranium height           |
| Mandible                | Co-LI   | Total mandibular length         |
|                         | Co-Me   | Length from condylar head to Me |
|                         | Co-Gn   | Ramus height                    |
|                         | Go-Mn   | Posterior corpus length         |
|                         | Mi-LI   | Anterior corpus length          |
| Transverse measurements | Go1-Go2 | Bigonial width                  |
|                         | C1-C2   | Maximum cranial width           |
|                         | P1-P2   | Palatal width                   |

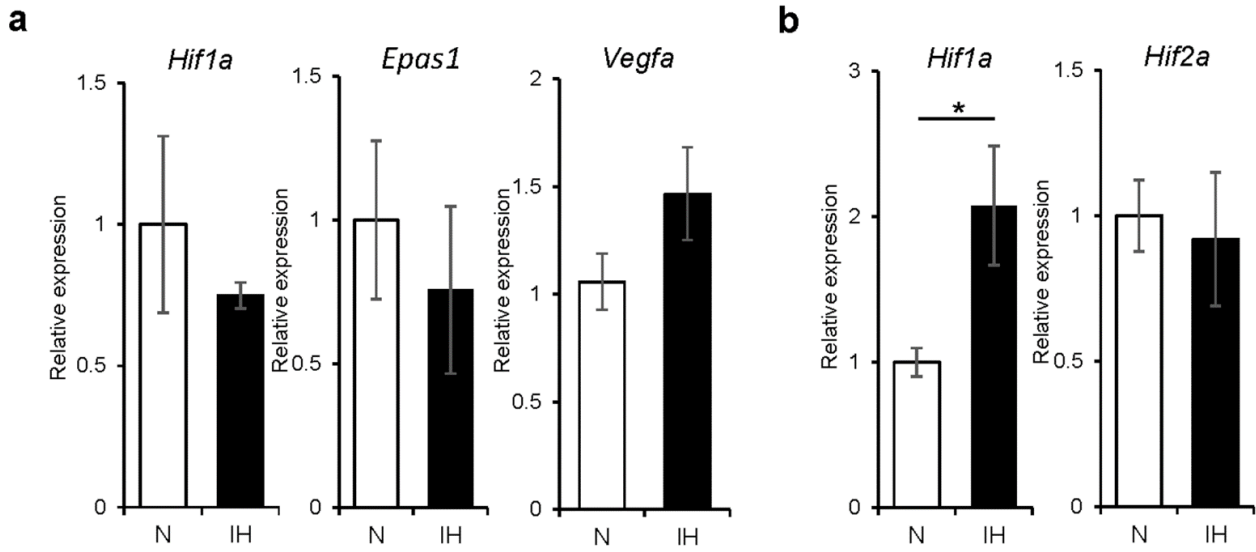

**Supplementary Figure. S1. Gene expression levels of HIFs and VEGF in mandibular condyle and tibia.** Relative gene expression levels of HIF-1 $\alpha$  (*Hif1a*), HIF-2 $\alpha$  (*Epas1*) and VEGF (*Vegfa*) were compared by TaqMan Gene Expression Assays (*Hif1a*, Rn01472831\_m1; *Epas1*; Rn00576515\_m1; *VEGF*; Rn01511602\_m1; *Hprt1* (internalcontrol), Rn01527840\_m1). Relative mRNA expression levels of *Hif1a*, *Epas1* and *Vegfa* in the mandibular condylar cartilage (a) and relative mRNA expression levels of *Hif1a* and *Epas1* in the tibial cartilage (b). Data are presented as mean  $\pm$  SEM for each group. \*:  $p < 0.05$ .
